# Supplementary material for: Modulation of Neutrophil Activity by Soluble Complement Cleavage Products—An In-Depth Analysis
Source: MDPI journal article supplement (doi:10.3390/cells11203297), 2022-10-20
Supplement: s1 [file s1]

[illegible]

|             |                           |                           |                           |                           |                            |                             |                            |                            |                            |                            |                            |                            |
|-------------|---------------------------|---------------------------|---------------------------|---------------------------|----------------------------|-----------------------------|----------------------------|----------------------------|----------------------------|----------------------------|----------------------------|----------------------------|
| <b>CD46</b> | 99.9<br>(90.6  <br>100.0) | 99.2<br>(97.6  <br>100.0) | 99.9<br>(99.6  <br>100.0) | 99.9<br>(99.7  <br>100.0) | 100.0<br>(99.8  <br>100.0) | 100.0<br>(100.0  <br>100.0) | 100.0<br>(99.9  <br>100.0) | 100.0<br>(99.8  <br>100.0) | 100.0<br>(99.9  <br>100.0) | 100.0<br>(99.8  <br>100.0) | 100.0<br>(99.9  <br>100.0) | 100.0<br>(99.9  <br>100.0) |
| <b>CD55</b> | 94.6<br>(90.1  <br>98.6)  | 98.5<br>(97.9  <br>99.9)  | 99.1<br>(98.7  <br>99.4)  | 96.6<br>(94.3  <br>98.7)  | 94.2<br>(92.1  <br>99.3)   | 97.4<br>(95.5  <br>98.9)    | 99.0<br>(96.1  <br>99.5)   | 99.3<br>(97.9  <br>99.5)   | 96.1<br>(92.9  <br>99.1)   | 98.5<br>(94.4  <br>99.5)   | 98.1<br>(95.8  <br>99.5)   | 99.1<br>(97.4  <br>99.4)   |

**Supplementary Table S1.** Summary of the neutrophils positive for the used surface markers in relationship to a respective isotype.  $n = 6 - 8$ , median (first quartile | third quartile).

| PC | CD10  | CD15  | CD16  | CD62L | CD35  | CD11b | C3aR  | C5aR1 | C5aR2 | CD46  | CD55  | explained<br>variance<br>[%] | explained<br>variance<br>cumulative<br>[%] |
|----|-------|-------|-------|-------|-------|-------|-------|-------|-------|-------|-------|------------------------------|--------------------------------------------|
| 1  | 0.36  | 0.35  | 0.35  | -0.31 | 0.30  | 0.36  | 0.02  | -0.29 | -0.12 | 0.32  | 0.33  | 62.29                        | 62.29                                      |
| 2  | -0.06 | -0.03 | 0.01  | 0.01  | -0.10 | -0.11 | 0.81  | 0.39  | -0.08 | 0.30  | 0.27  | 13.09                        | 75.38                                      |
| 3  | 0.03  | 0.06  | -0.02 | -0.08 | -0.09 | 0.07  | -0.03 | 0.07  | 0.97  | 0.15  | 0.10  | 8.64                         | 84.03                                      |
| 4  | 0.09  | 0.24  | 0.34  | 0.65  | 0.41  | 0.19  | 0.10  | 0.28  | 0.10  | -0.25 | -0.17 | 4.67                         | 88.70                                      |
| 5  | 0.10  | 0.39  | 0.31  | 0.16  | -0.72 | 0.00  | 0.14  | -0.25 | -0.03 | 0.04  | -0.32 | 4.32                         | 93.02                                      |
| 6  | -0.05 | -0.21 | 0.01  | 0.53  | 0.14  | -0.35 | -0.03 | -0.49 | 0.04  | 0.52  | 0.11  | 2.40                         | 95.43                                      |
| 7  | 0.62  | -0.45 | 0.01  | -0.15 | 0.12  | -0.02 | 0.25  | -0.06 | 0.07  | 0.04  | -0.54 | 1.58                         | 97.01                                      |
| 8  | 0.14  | -0.01 | 0.30  | -0.04 | -0.10 | -0.24 | -0.48 | 0.59  | -0.11 | 0.47  | -0.08 | 1.16                         | 98.17                                      |
| 9  | -0.24 | 0.32  | -0.49 | 0.00  | 0.16  | 0.34  | 0.03  | 0.06  | -0.05 | 0.46  | -0.49 | 0.92                         | 99.09                                      |
| 10 | 0.51  | -0.06 | -0.47 | 0.37  | -0.31 | 0.34  | -0.15 | 0.13  | -0.10 | 0.02  | 0.34  | 0.61                         | 99.71                                      |
| 11 | 0.34  | 0.55  | -0.34 | -0.07 | 0.17  | -0.63 | 0.03  | 0.01  | 0.02  | -0.14 | 0.02  | 0.29                         | 100.00                                     |

**Supplementary Table S2.** Principal component analysis (PCA) as well as its related first five principal components (PC) and loading matrix analyzing the change of indicated markers in stimulated neutrophils as described in the methods section.

|              | p-value<br>screening | p-value<br>confirmation | Ctrl                  | C5a                      |
|--------------|----------------------|-------------------------|-----------------------|--------------------------|
| CD10         | 0.0003               | 0.0079                  | 569.6 (549.3   725.6) | 4524 (3976   5164)       |
| CD15         | 0.1953               | 0.0159                  | 788.2 (582   872.2)   | 1313 (982.5   1486)      |
| CD62L        | 0.0134               | 0.5476                  | 2583 (1645   3420)    | 2014 (1488   2724)       |
| ROS          | 0.2759               | 0.9999                  | 959.6 (693.7   2021)  | 1102 (660.3   1853)      |
| Phagocytosis | 0.0229               | 0.1255                  | 18.89 (16.26   23.20) | 24.64 (20.61   41.72)    |
| CD16         | 0.2112               | 0.0411                  | 4360 (2985   6877)    | 8415 (4813   10177)      |
| CD35         | 0.1451               | 0.0649                  | 1727 (1450   2268)    | 12368 (5577   18881)     |
| CD11b        | 0.0018               | 0.0079                  | 915.4 (738.9   1310)  | 7807 (7255   12919)      |
| C5aR1        | 0.0275               | 0.2086                  | 3782 (3696   5094)    | 2937 (2630   4566)       |
| C5aR2        | 0.0439               | 0.0043                  | 1829 (1729   2013)    | 1604 (1485   1656)       |
| CD46         | 0.0657               | 0.0175                  | 1548 (1526   1646)    | 1844 (1758   1934)       |
| CD55         | 0.0382               | 0.0087                  | 5236 (4512   6834)    | 8124 (6877   11556)      |
| FSC          | 0.0006               | 0.0079                  | 79420 (75756   83090) | 127612 (123216   145483) |
| MP           | 0.0165               | 0.0262                  | 4437 (3980   5727)    | 6365 (6054   8046)       |
| pHi          | 0.0001               | 0.0079                  | 7.50 (7.43   7.58)    | 7.91 (7.89   7.97)       |
| GlcU         | 0.0039               | 0.0079                  | 3668 (3191   4072)    | 6088 (5581   7191)       |

**Supplementary Table S3.** Comparison of resulting p-values of the screening process (corresponding results are reported in Figures 2 and 3) and the confirmation approach including the original data. MP is reported as DiBAC<sub>4</sub>(3) fluorescence, pHi determined by SNARF fluorescence, and GlcU is quantified by 2NBDG fluorescence. The statistical approach is reported in detail in the method section using Kruskal-Wallis test with uncorrected Dunn's test for the screening process and Mann Whitney to confirm the findings.  $n = 6 - 8$ .

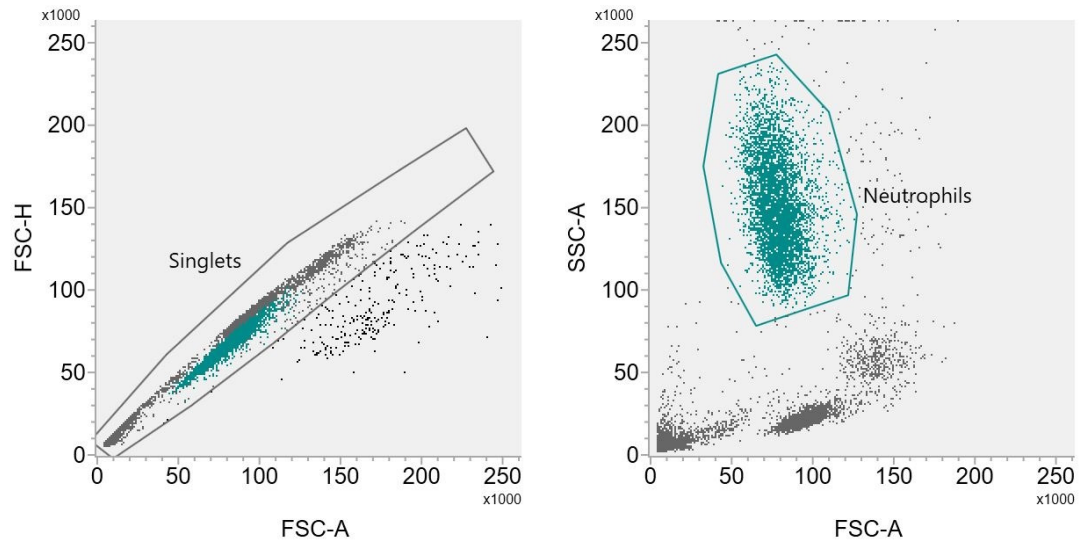

**Supplementary Figure S1.** Representative result of the leukocyte isolation procedure and summary of the applied gating strategy. Following identification of singlets (here: 98.1% of parent population) by checking linearity of FSC-A vs. FSC-H polymorphonuclear granulocytes (here referred to as neutrophils: 41.6% of parent population) mainly consisting of neutrophils were identified by FSC-A and SSC-A.

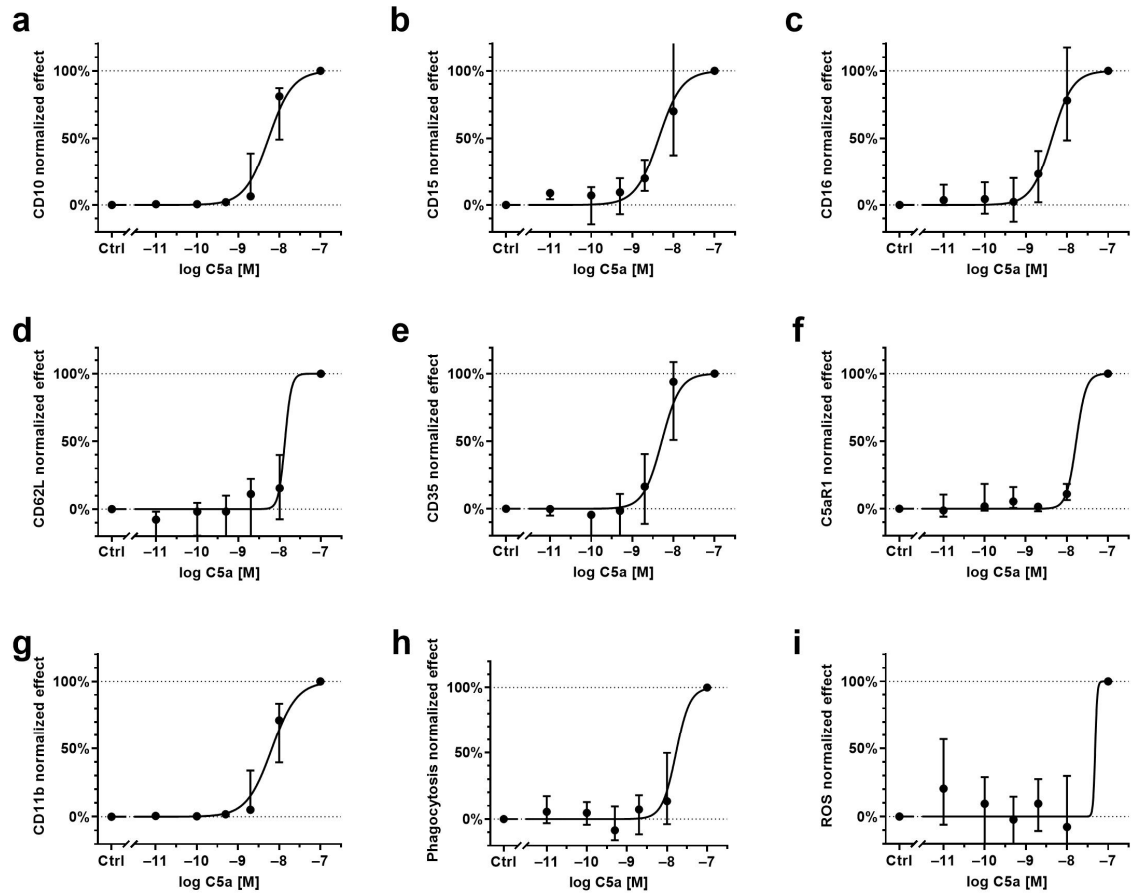

**Supplementary Figure S2.** Concentration-response curves of cellular function and neutrophil phenotype after stimulation with C5a. (a) CD10, (b) CD15, (c) CD16, (d) CD62L, (e) CD35, (f) C5aR1, (g) CD11b, (h) Phagocytosis and (i) ROS. Curves were normalized to PBS<sup>+/+</sup> as control.  $n = 6 - 7$ , median  $\pm$  interquartile range.

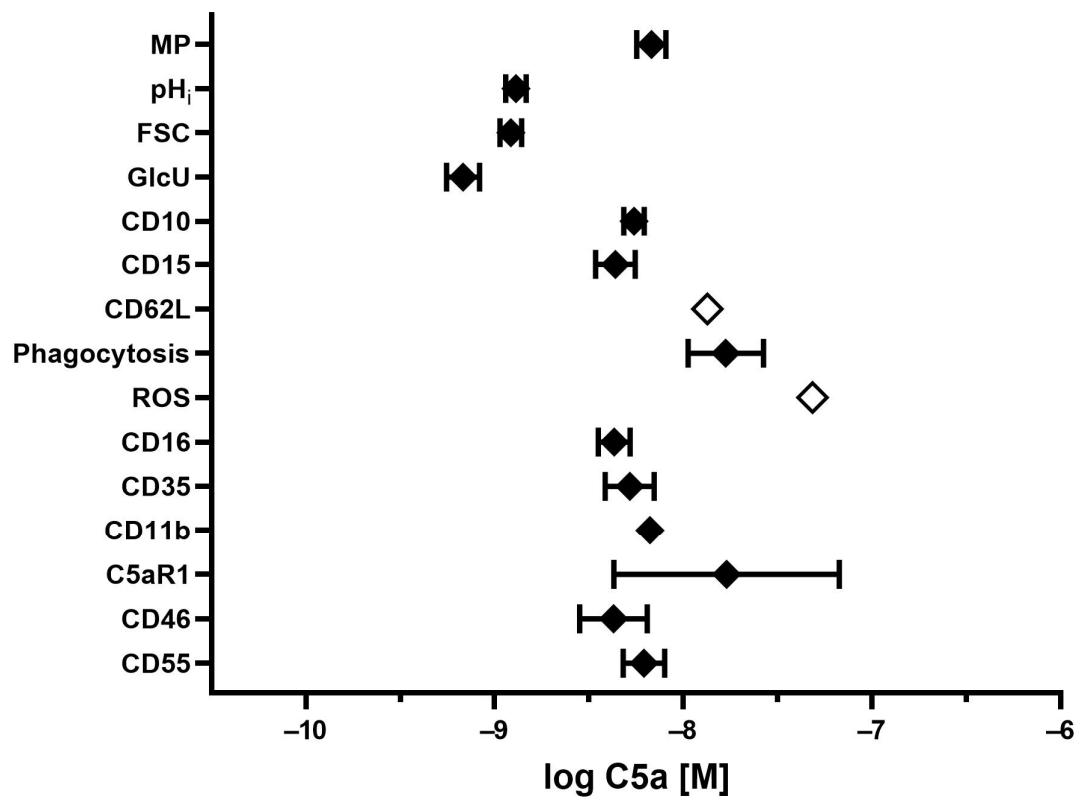

**Supplementary Figure S3.** Calculated EC<sub>50</sub> for the activation of neutrophils elicited by C5a.  $n = 6 - 7$ , mean  $\pm$  standard error of the mean of the EC<sub>50</sub>. For empty diamonds, confidence intervals could not be calculated.

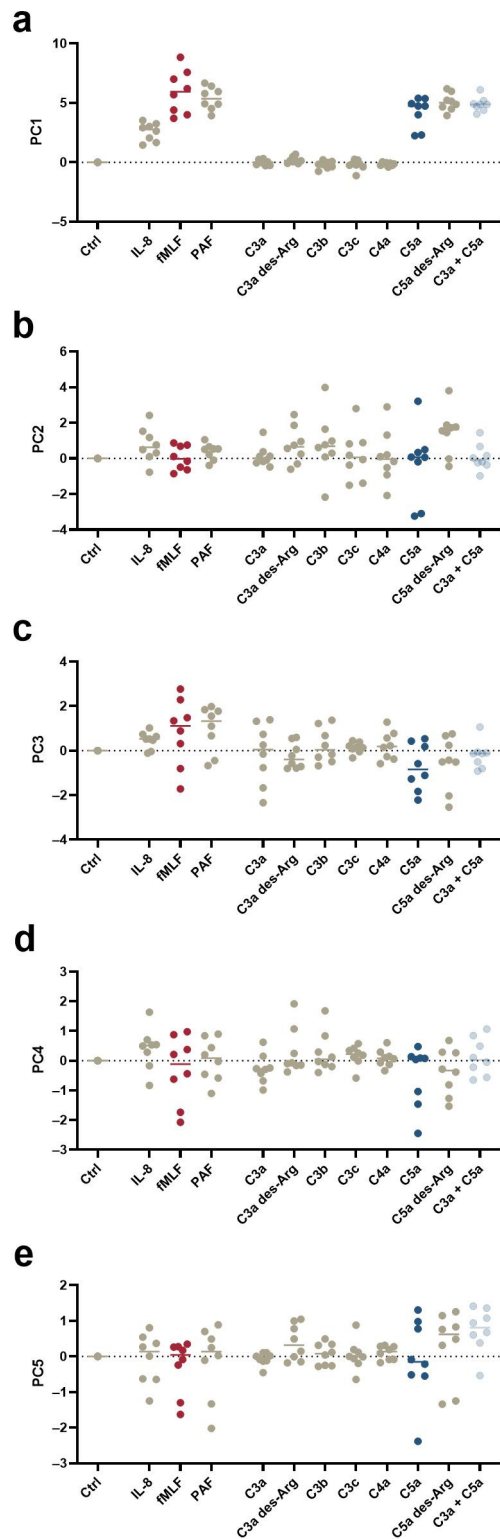

**Supplementary Figure S4.** Result of the principal component analysis (PCA) evaluating the first principal components (PC). The PCA was conducted by analyzing the change in neutrophil phenotype elicited by the respective stimulus as listed on the Y-axis. (a–e) Unstimulated neutrophils were set to 0. The corresponding loading matrix is reported in Supplementary Table S2. n = 8.

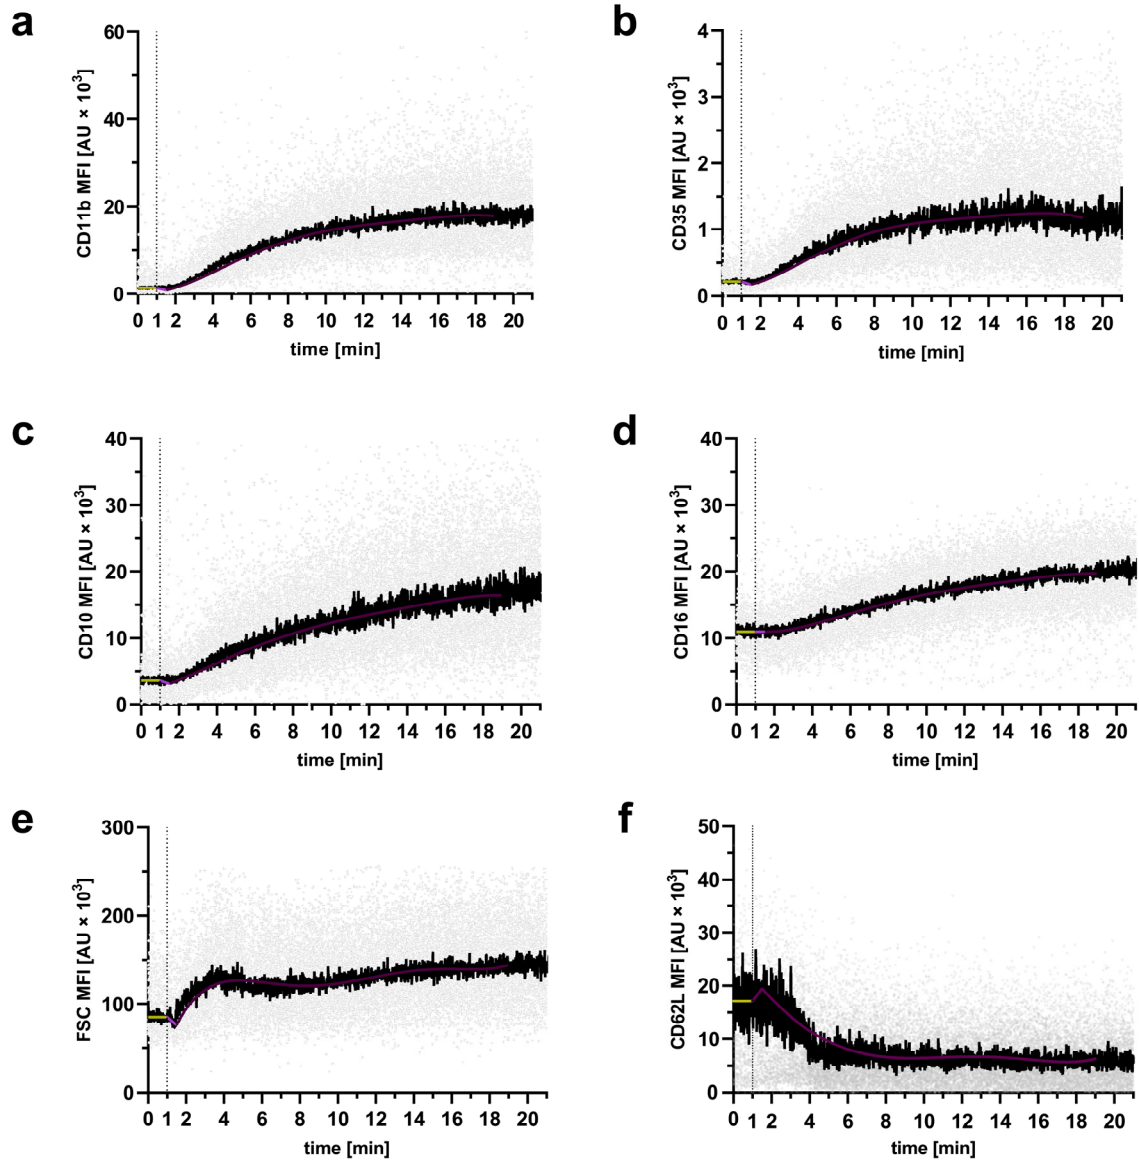

**Supplementary Figure S5.** Curve fitting for (a) CD11b, (b) CD35, (c) CD10, (d) CD16, (e) FSC, and (f) CD62L from a representative experiment. Gray dots indicate single cells. The black line shows a moving median analyzing nine consecutive neutrophils. The yellow line indicates the baseline, pink indicates the first 30 seconds as a linear approximation, and violet displays the used polynomial as described in the methods section.
